# Supplementary material for: α-Linolenic acid induces clearance of Tau seeds via Actin-remodeling in Microglia
Source: PubMed Central journal article supplement (PMC8607384; doi:10.1186/s43556-021-00028-1), 2021-02-09
Supplement: 43556_2021_28_MOESM1_ESM.pdf [file 43556_2021_28_MOESM1_ESM.pdf]

# **$\alpha$ -Linolenic acid induces clearance of Tau seeds *via* Actin-remodeling in Microglia**

**Smita Eknath Desale<sup>1,2</sup> Subashchandraboze Chinnathambi<sup>1,2,\*</sup>**

<sup>1</sup>Neurobiology Group, Division of Biochemical Sciences, CSIR-National Chemical Laboratory,  
Dr. Homi Bhabha Road, Pune, 411008, India

<sup>2</sup>Academy of Scientific and Innovative Research (AcSIR), Ghaziabad, 201002, India

\*To whom correspondence should be addressed: **Prof. Subashchandraboze Chinnathambi**,  
Neurobiology group, Division of Biochemical Sciences, CSIR-National Chemical Laboratory (CSIR-  
NCL), Dr. Homi Bhabha Road, 411008 Pune, India, Telephone: +91-20-25902232, Fax. +91-20-  
25902648. Email: [s.chinnathambi@ncl.res.in](mailto:s.chinnathambi@ncl.res.in)

## **Author details**

Smita Eknath Desale, email: [se.desale@ncl.res.in](mailto:se.desale@ncl.res.in)

Subashchandraboze Chinnathambi, email: [s.chinnathambi@ncl.res.in](mailto:s.chinnathambi@ncl.res.in)

## Supplementary Figure- 1

### $\alpha$ -Linolenic acid enhance membrane ruffling in microglia

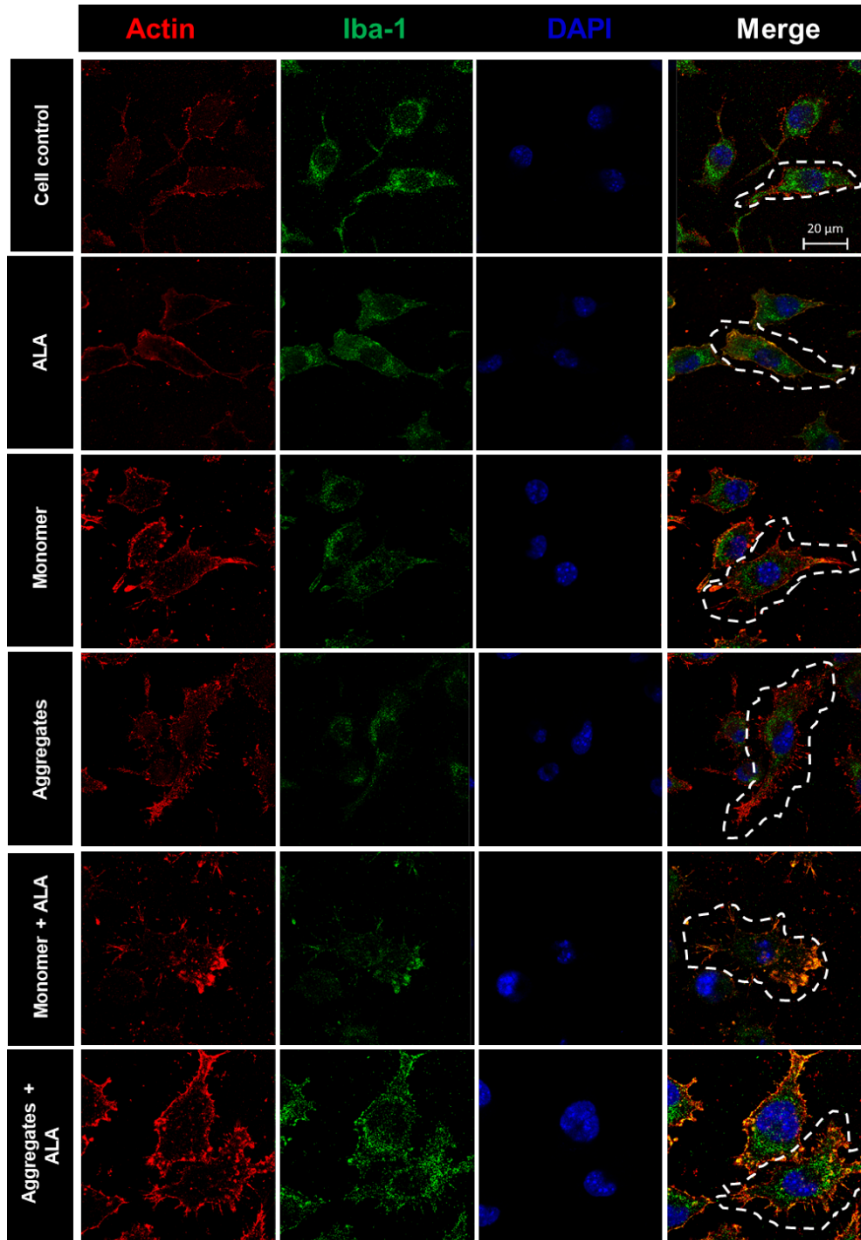

**Supplementary figure 1.  $\alpha$ -Linolenic acid enhances membrane ruffling in microglia.** The image indicates different panel of fluorescence image, scale bar is 20  $\mu$ m. The enlarged images presented in figure 4 have been taken from marked cells with dotted lines.

Supplementary Figure- 2

$\alpha$ -Linolenic acid induces actin polymerization

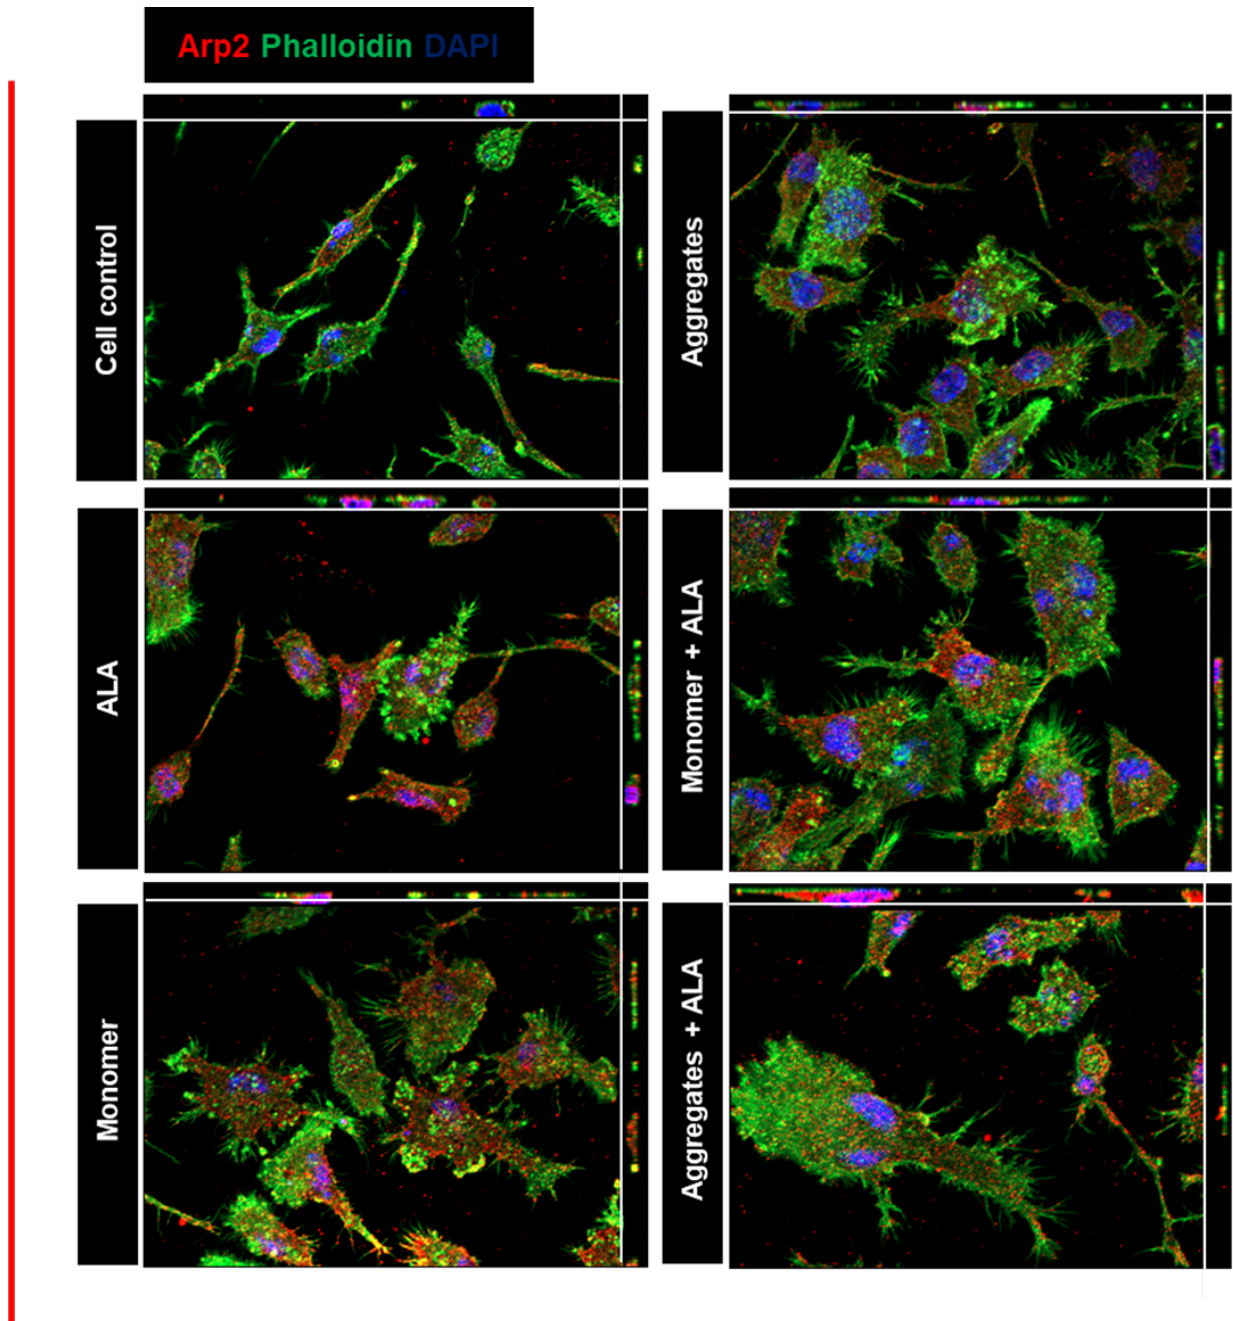

Supplementary figure 2.  $\alpha$ -Linolenic acid induces actin polymerization. The orthogonal images indicating XY plane that denotes intracellular colocalization areas of F-actin and Arp2/3 complex.
